# Supplementary material
Source: MDPI journal article supplement (https://www.mdpi.com/2218-1997/6/10/187)

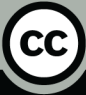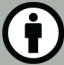

BY

Supplement: s1 [file s1]

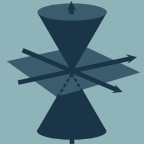

*universe*

Supplement: s1 [file s1]

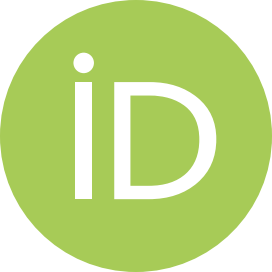

Supplement: s1 [file s1]
